# Supplementary material for: Mcl-1 protects eosinophils from apoptosis and exacerbates allergic airway inflammation
Source: PubMed Central journal article supplement (PMC7361019; doi:10.1136/thoraxjnl-2019-213204), 2020-04-17

## Figure S1

Felton JM *et al.*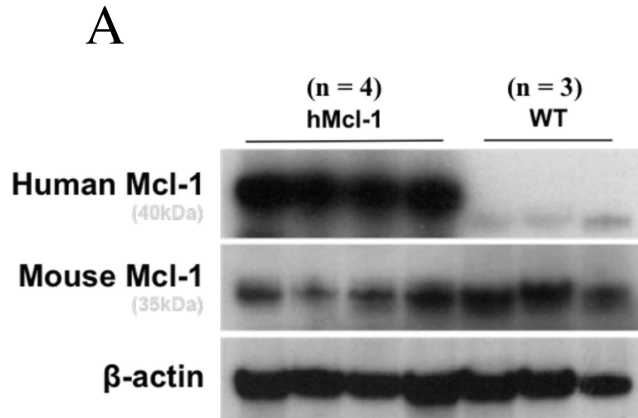

## Figure S2

Felton JM *et al.*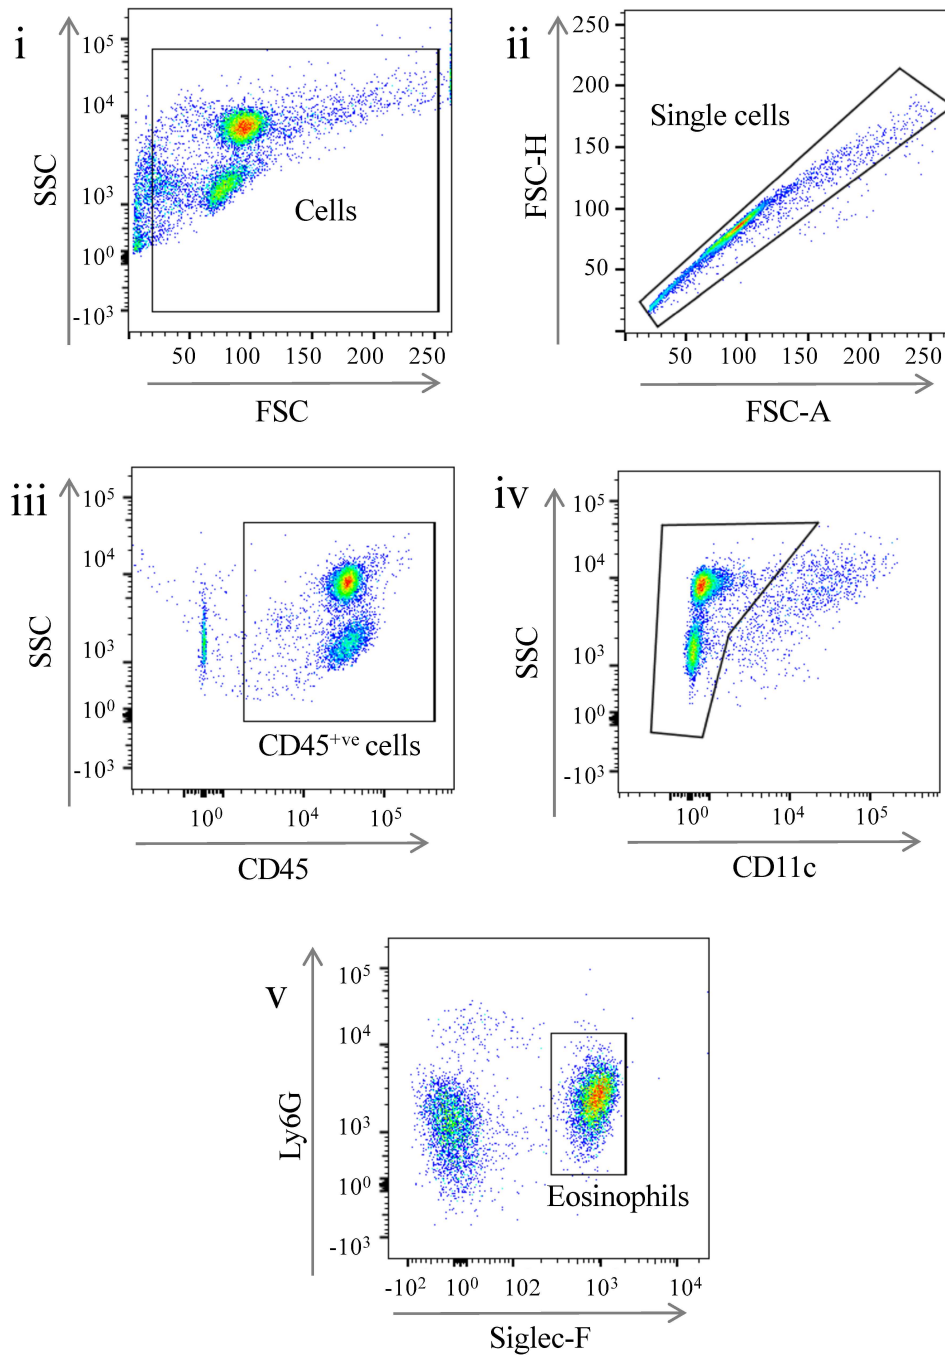

## Figure S3

Felton JM *et al.*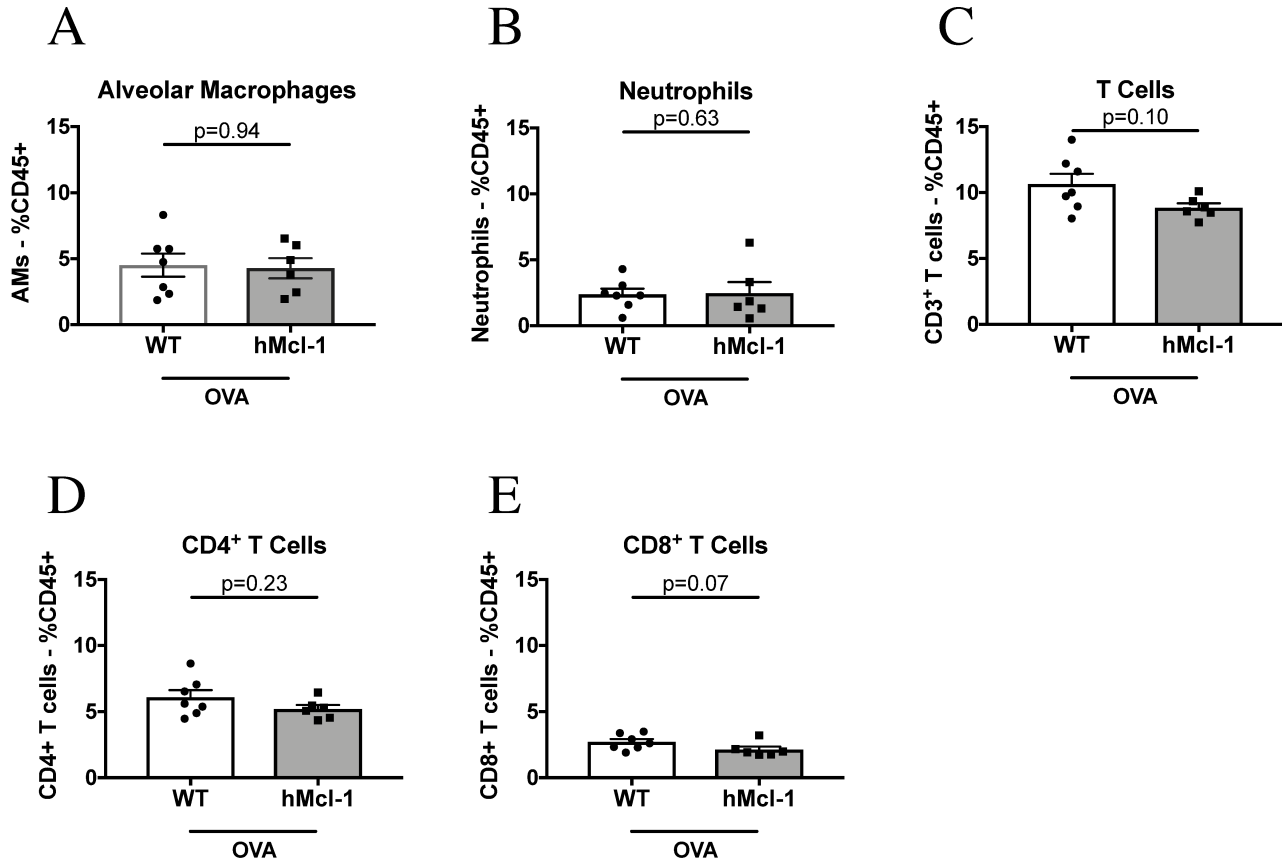

Supplement: thoraxjnl-2019-213204supp001.pdf [file thoraxjnl-2019-213204supp001.pdf]
